# Supplementary material for: Longitudinal multimodal imaging-compatible mouse model of triazole-sensitive and -resistant invasive pulmonary aspergillosis
Source: Oxford University Press journal article supplement (doi:10.1242/dmm.049165), 2022-03-01
Supplement: dmm049165supp.pdf [file dmm049165supp.pdf]

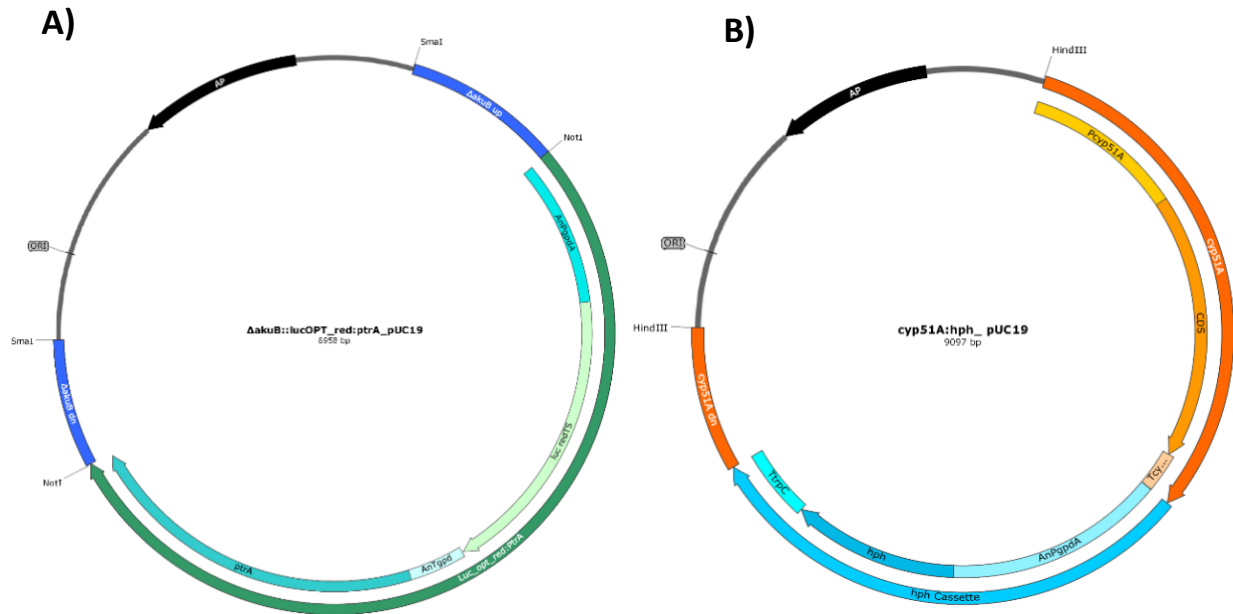

**Fig. S1. Maps of plasmids generated in this study.** **A)** Plasmid map of the *akuB* deletion cassette for expression of the red-shifted thermostable luciferase (*luc\_redTS*) from the *akuB* locus in *A. fumigatus*. The cassette was excised by *SmaI* restriction and used for transformation of the *A. fumigatus* wild-type strain CBS144.89. **B)** Plasmid map of the *cyp51A* and hygromycin complementation cassette for the transformation of the genetically modified triazole-resistant *A. fumigatus* strains and reversion to the wild-type *cyp51A* gene. To perform the transformation of *Af\_ΔakuB::luc<sup>OPT\_red</sup>\_ptrA\_4003-new7* and *Af\_ΔakuB::luc<sup>OPT\_red</sup>\_ptrA\_3216-1*, the complementation construct was released from the vector backbone by *HindIII* restriction and gel-purified. **Abbreviations:** Upstream region of the *akuB* gene ( $\DeltaakuB$  up), glyceraldehyde-3-phosphate dehydrogenase gene (*gpdA*) promoter (*AnPgpdA*) and terminator (*AnTgpd*) region, *pyrithiamine* resistance gene (*ptrA*), downstream region of the *akuB* gene ( $\DeltaakuB$  dn), *cyp51A* gene (*cyp51A*) promoter (*Pcyp51A*), coding region (CDS) and terminator (Tcy) regions, hygromycin B resistance gene (*hph*), tryptophan terminator (*TtrpC*), downstream region of the *cyp51A* gene (*cyp51A* dn).

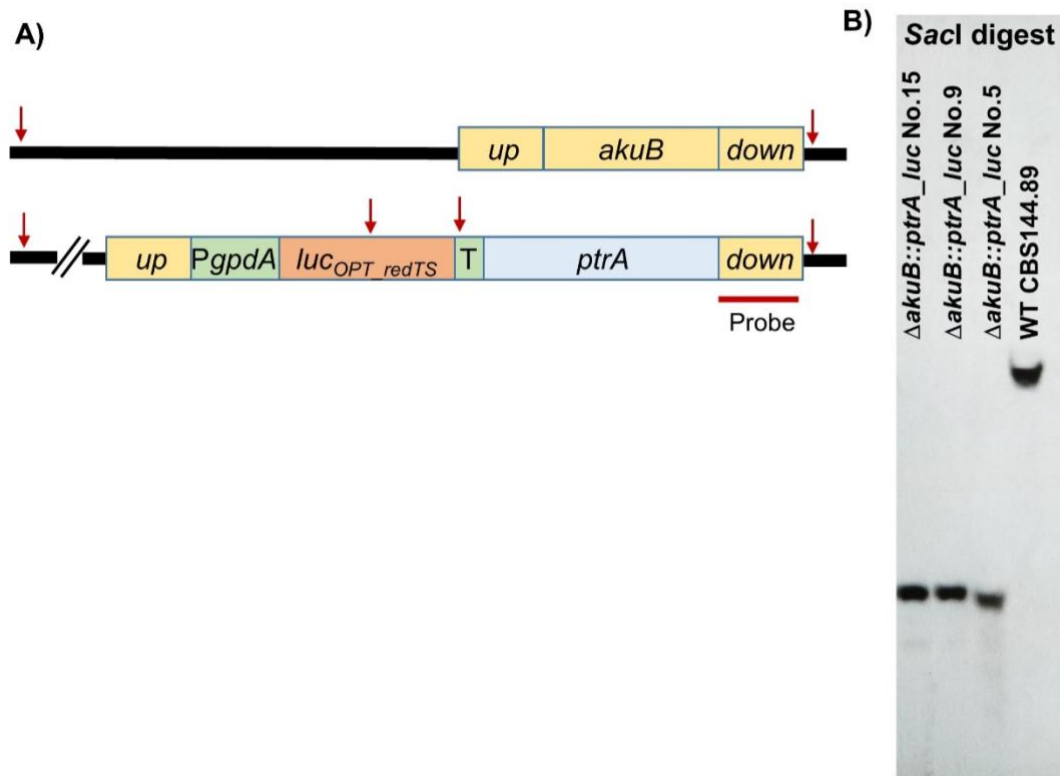

**Fig. S2A. Southern blot analysis for confirmation of the replacement of the *akuB* locus in *A. fumigatus* by the luciferase expression construct. (A)** Scheme of the genomic *akuB* locus in wild type and deletion mutants. The *akuB* locus was replaced by a codon-optimised and red-shifted thermostable firefly luciferase under control of the *gpdA* promoter (*PgpdA*) and its terminator (T). The pyrithiamine resistance gene (*ptrA*) served as marker in the transformation. *SacI* restriction sites are indicated by arrows. A probe against the downstream region was generated. **(B)** Southern blot analysis of *SacI* digested genomic DNA of wild type and deletion mutants showing the expected shift of the wild-type signal from 6193 bp to 3670 bp in the luciferase-expressing *akuB* deletion mutants. Strain No. 5 was used in subsequent experiments as parental strain.

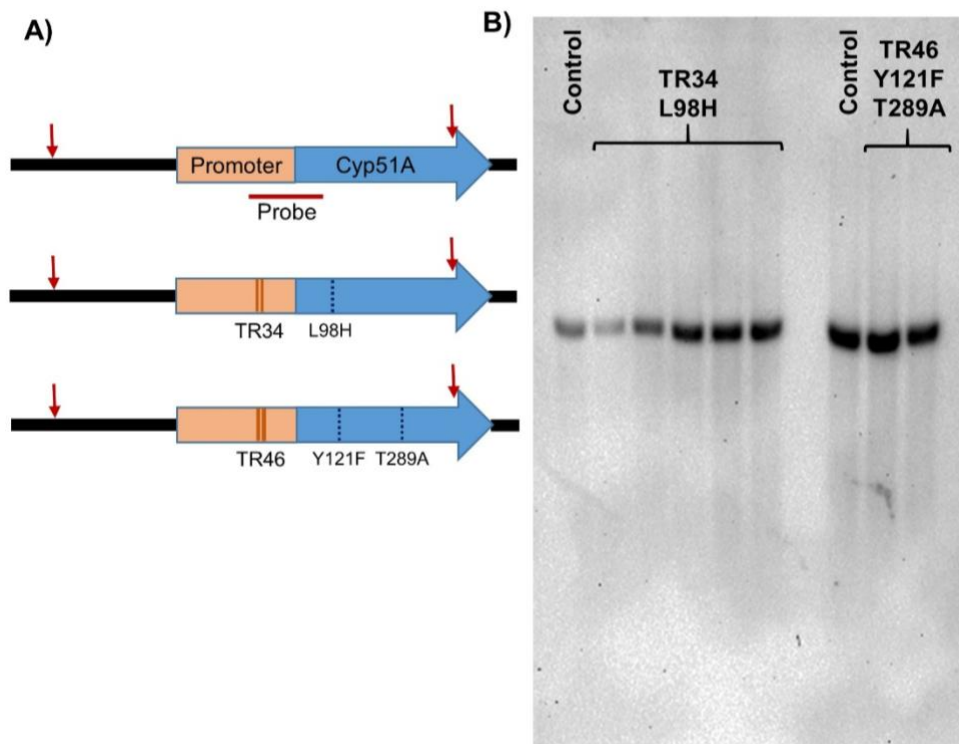

**Fig. S2B. Southern blot analysis of itraconazole resistant *A. fumigatus* transformants.** The parental  $\DeltaakuB::luc$  strain was transformed with the respective promoter and partial *cyp51A* gene fragment to achieve the desired mutations of the *cyp51A* gene. Transformants were regenerated on an itraconazole containing medium. **(A)** Scheme of the genomic situation of the *cyp51A* gene in the parental control strain and the *cyp51A* mutants. *Bam*HI restriction sites are indicated by arrows and result in a 3596 bp fragment for the *cyp51A* wild-type situation, 3630 bp for TR34/L98H mutants and 3642 bp for TR46/Y121/T289A mutants. **(B)** Southern blot analysis of *Bam*HI restricted genomic DNA of parental control strain and itraconazole resistant transformants. Only a single copy of the *cyp51A* gene is detected. Mutations in the *cyp51A* promoter and coding region were confirmed from selected strains by gene sequence analysis.

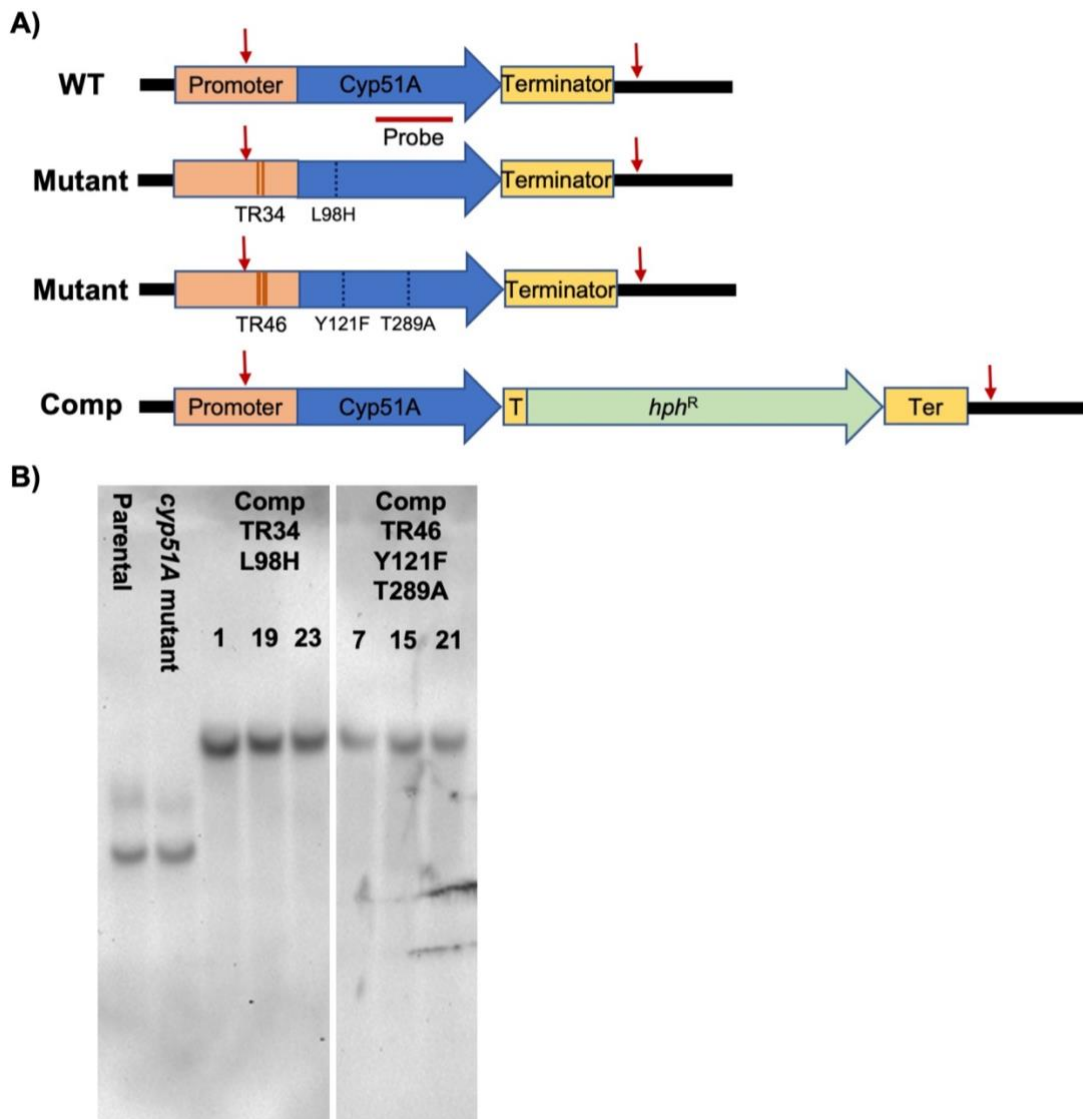

**Fig. S2C. Southern blot analysis confirming the integration of the complementation construct into the *cyp51A* locus of triazole resistant mutants.** The mutated *cyp51A* gene copy was replaced by the wild-type *cyp51A* gene using the hygromycin B resistance marker for selection of transformants. (A) Scheme of the genomic *cyp51A* gene situation in the parental control strain (WT), the *cyp51A* mutants and complemented mutants (Comp). *Xba*I restriction sites are indicated by arrows and result in a 3 kb fragment before and a 6 kb fragment after complementation. (B) Southern blot of *Xba*I restricted genomic DNA of parental control strain a *cyp51A* mutant strain and complemented mutants (Comp). A single signal with the expected size shift is observed in the complemented strains.

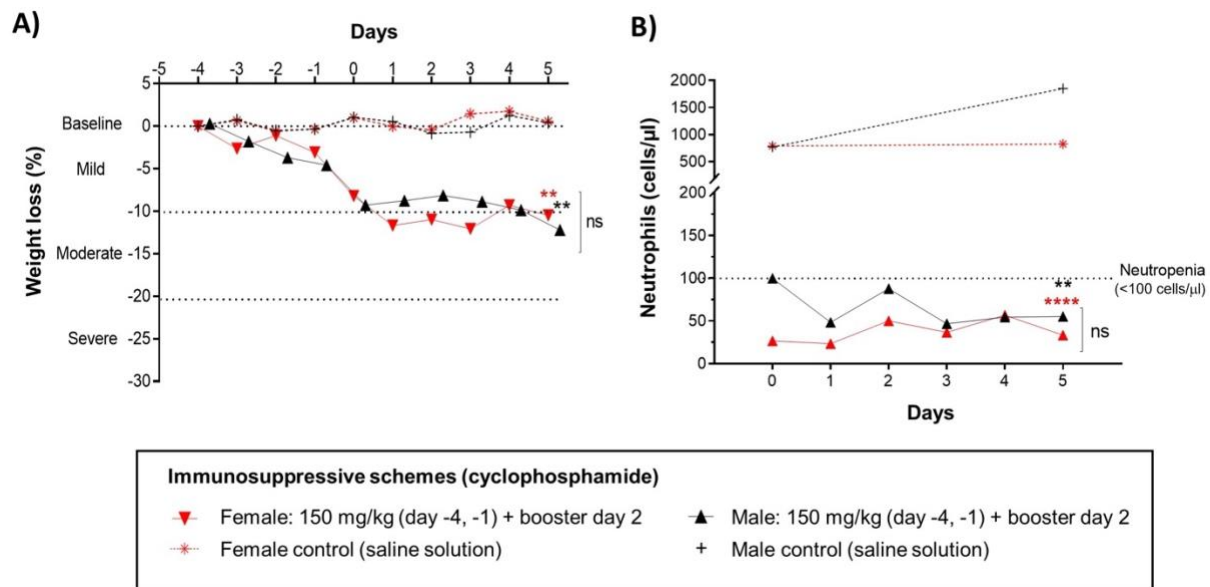

**Fig. S3. Scheme of immunosuppressive effects on weight loss and neutropenia induction by cyclophosphamide injection with 150 mg/kg (day -4, -1) + booster at day 2 amongst male and female mice. A)** Evolution of weight loss (% compared to baseline; mild 0-10%, moderate 10-20% and severe >20%) of tested cyclophosphamide immunosuppressive scheme between male and female mice and corresponding control group (saline solution) from day -4 (initiation of immunosuppressive therapy/baseline) until day 5. Graph represents mean value of weight loss percentage. **B)** Neutrophil count (cells/μl) kinetics after cyclophosphamide-induced immunosuppression between the female and male group and controls. Graph represents mean value (n = 3, per group per time point). *Mixed model ANOVA (multiple comparison analysis, Tukey correction)* to control group (above) and between gender (*lateral*); \*  $p = <0.05$ , \*\*  $p = <0.005$ , \*\*\*  $p = <0.0005$ , ns: non-significant.

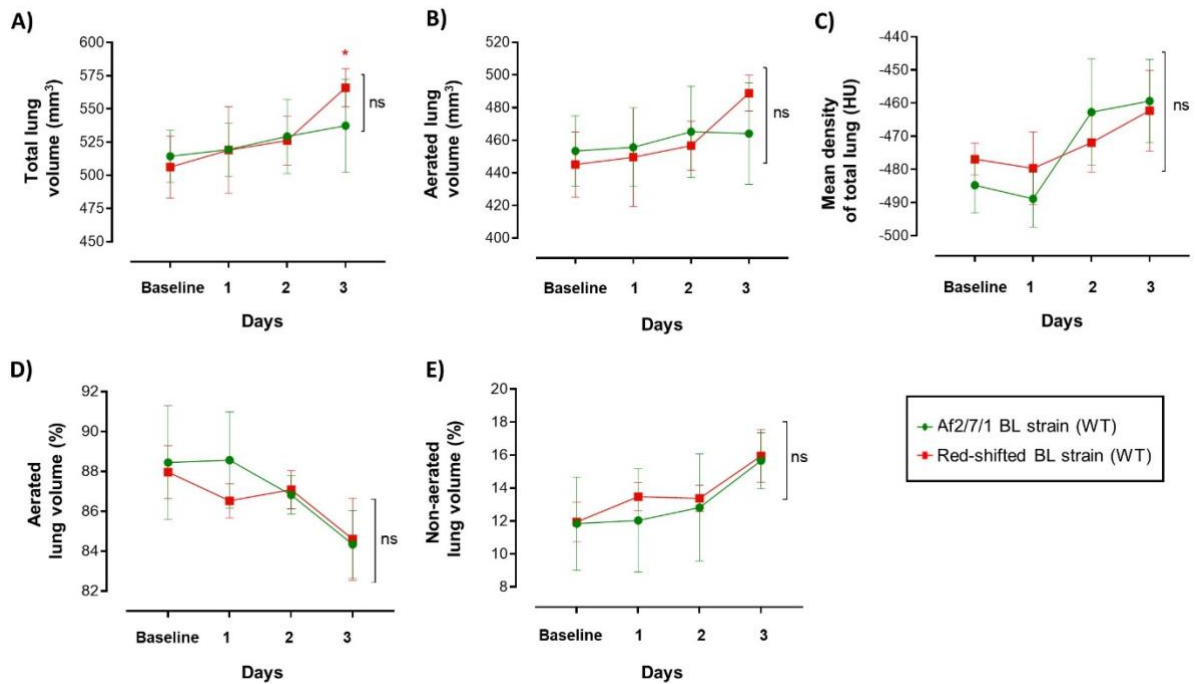

**Fig. S4. Micro-CT-derived lung biomarkers of mice infected with the wild-type Af2/7/1 and Af\_lucOPT\_red\_WT *Aspergillus fumigatus* strains.**

**A)** Micro-CT derived biomarkers quantifying the total lung volume and **B)** aerated lung volume of intranasally infected mice ( $5 \times 10^5$  spores) with the wild-type BL Af2/7/1/2 and Af\_lucOPT\_red\_WT strains. **C)** Mean density of total lung (HU) evolution over time. **D)** Aerated, and **E)** non-aerated lung volume percentages from total lung volume variances over time for infected mice. Error bars represent SD of the results (mean) from multiple mice ( $n = 5$  male). Two-way repeated measures ANOVA (multiple comparison analysis, Tukey correction); \*  $p = 0.05$ , to baseline (above) and between groups (lateral). **Abbreviations:** Wild type (WT), Bioluminescent (BL), micro-computed tomography (micro-CT), Hounsfield Unit (HU), non-significant (ns).

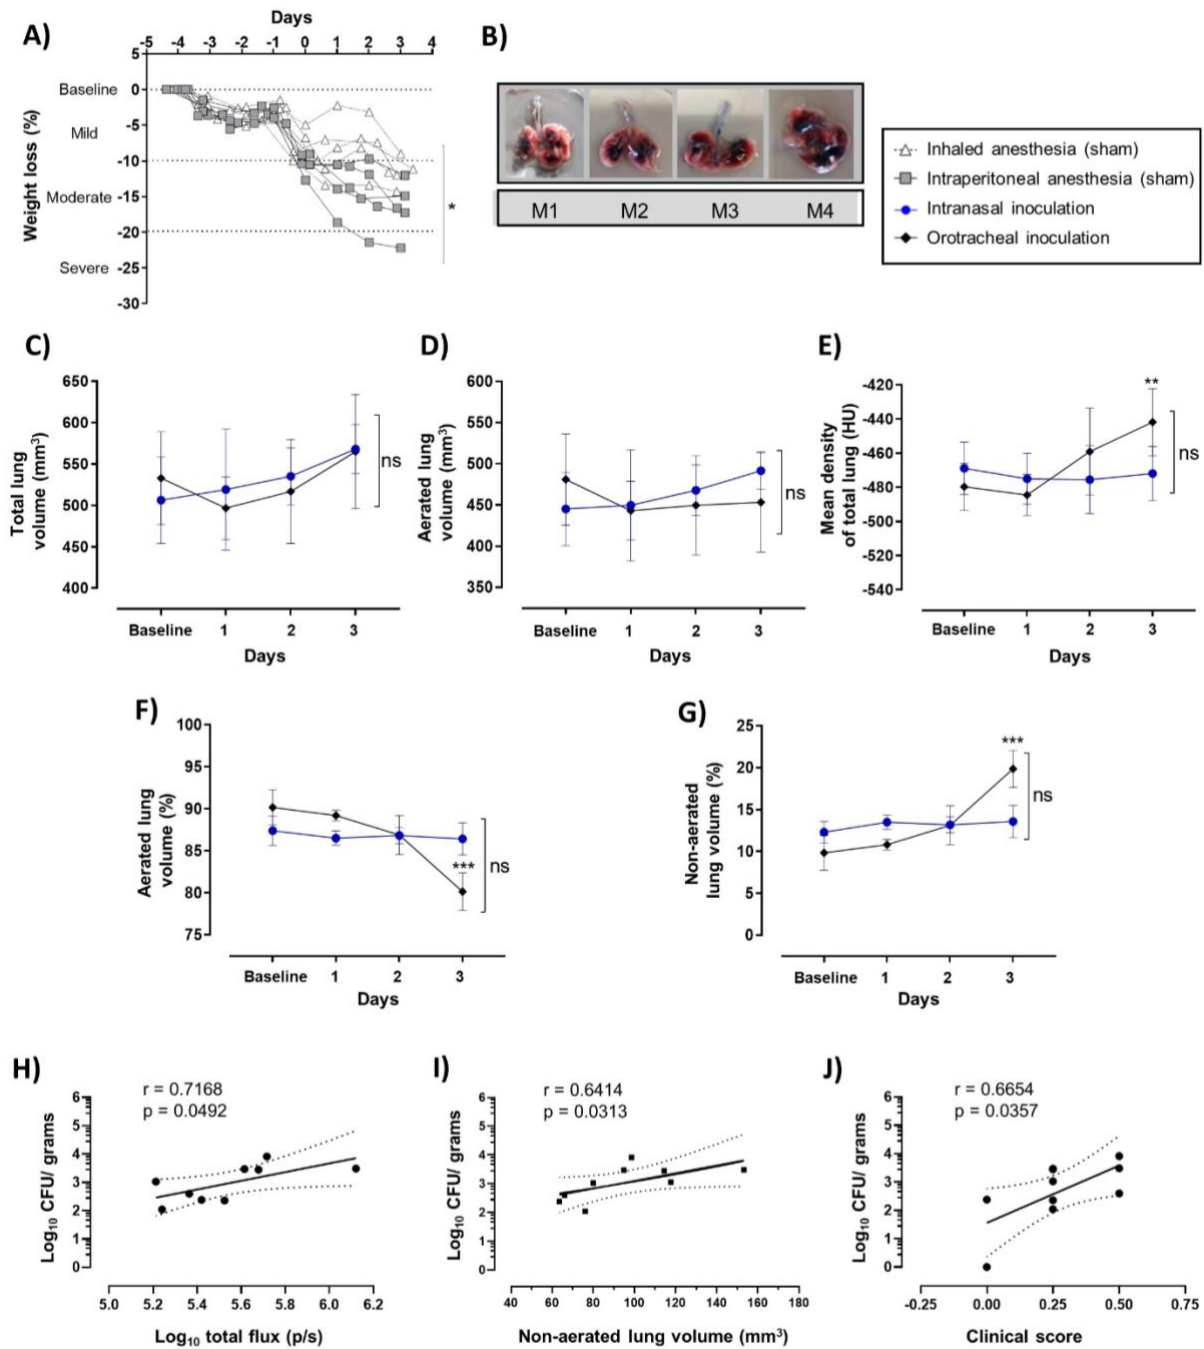

**Fig. S5. Orotracheal route of inoculation characterization of non-infected mice, micro-CT derived biomarkers and correlation of imaging biomarkers from orotracheally and intranasally infected mice.** **A)** Relative weight loss evolution in non-infected mice orotracheally sham-infected (25  $\mu$ l saline-solution) immunocompromised mice after inhaled or peritoneally injected anaesthesia. **B)** Non-infectious *ex vivo* orotracheal route technique-assessment in mice (n = 4 male) after instillation with trypan blue (25  $\mu$ l). **C)** Quantitative total and **D)** aerated lung tissue volume measurements of intranasally and orotracheally infected mice ( $5 \times 10^5$  Af<sub>lucOPT<sub>red</sub>WT</sub> spores) over time. **E)** Mean total lung density volume per mouse group over the time course of infection (HU). Percentage variances of **F)** aerated and **G)** non-aerated lung volumes from total lung volume before (baseline) and after infection.

Correlation and linear regression analysis of infected mice of quantified imaging biomarker readouts: **H**) bioluminescent signal ( $\log_{10}$  total flux total), **I**) lung lesion development (non-aerated lung volume;  $\text{mm}^3$ ) and **J**) cumulative visual clinical score of lung lesion based on imaging scans to lung CFU counts ( $\log_{10}$ ) on day 3. Error bars represent SD of the results (mean) from multiple mice ( $n = 5$  male), dashed lines represent the 95% confidence band. Two-way ANOVA (multiple comparison analysis, Tukey correction), Pearson correlation; \*  $p = <0.05$ , \*\*  $p = <0.005$ , \*\*\*  $p = <0.0005$ , to baseline (above) and between groups (lateral). **Abbreviations:** Wild type (WT), micro-computed tomography (micro-CT), non-significant (ns), Hounsfield Unit (HU), colony forming units (CFU).



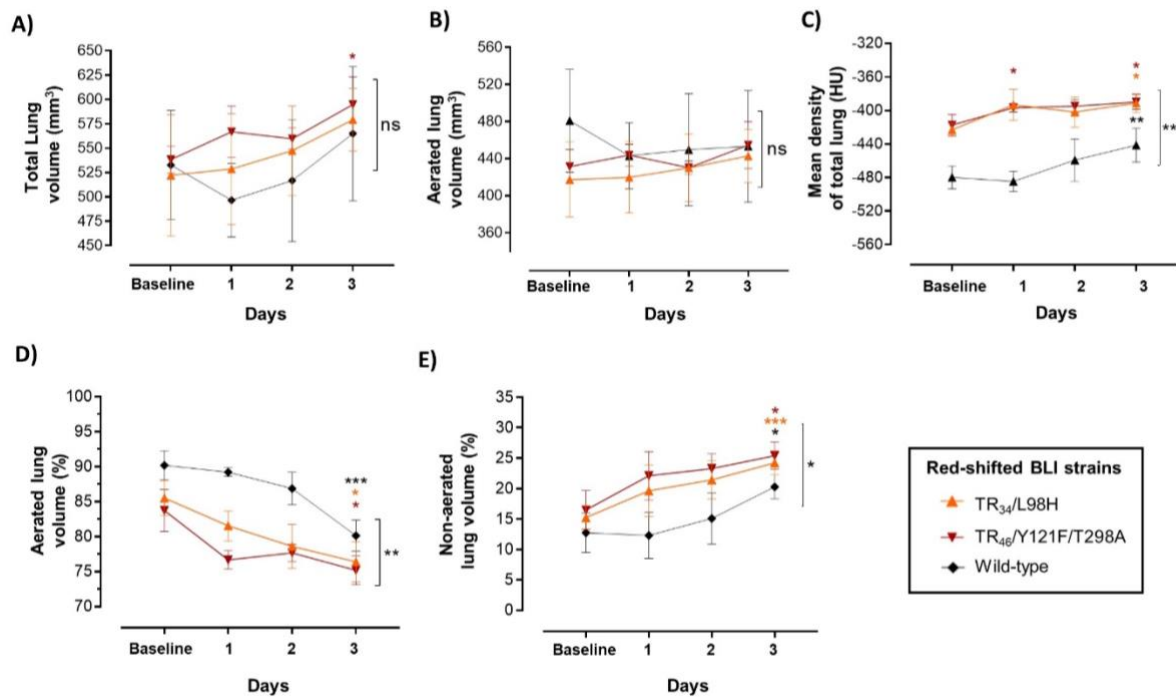

**Fig. S6. Micro-CT derived lung biomarkers upon IPA development after infection with red-shifted luciferase expressing wild-type and triazole-resistant *Aspergillus fumigatus* strains.**

**A)** Quantification of micro-CT derived total lung volume and **B)** aerated lung volume of mice orotracheally infected with red-shifted luciferase expressing and triazole-resistant (Af\_luc<sup>OPT\_red</sup>\_TR<sub>34</sub>, \_TR<sub>46</sub>) and WT (Af\_luc<sup>OPT\_red</sup>\_WT) *A. fumigatus* strains ( $5 \times 10^5$  spores) before and after infection. **C)** Mean density of total lung volume over time (HU). **D)** Longitudinal aerated and **E)** non-aerated lung volumes percentages relative to total lung volume of infected animals upon infection per day. Error bars represent SD of the results (mean) from multiple mice ( $n = 5$  male). Two-way repeated measures ANOVA (multiple comparison analysis, Tukey correction); \*  $p = <0.05$ , \*\*  $p = <0.005$ , \*\*\*  $p = <0.0005$ , to baseline (above) and WT (lateral). **Abbreviations:** IPA (invasive pulmonary aspergillosis), wild type (WT), micro-computed tomography (micro-CT), non-significant (ns).

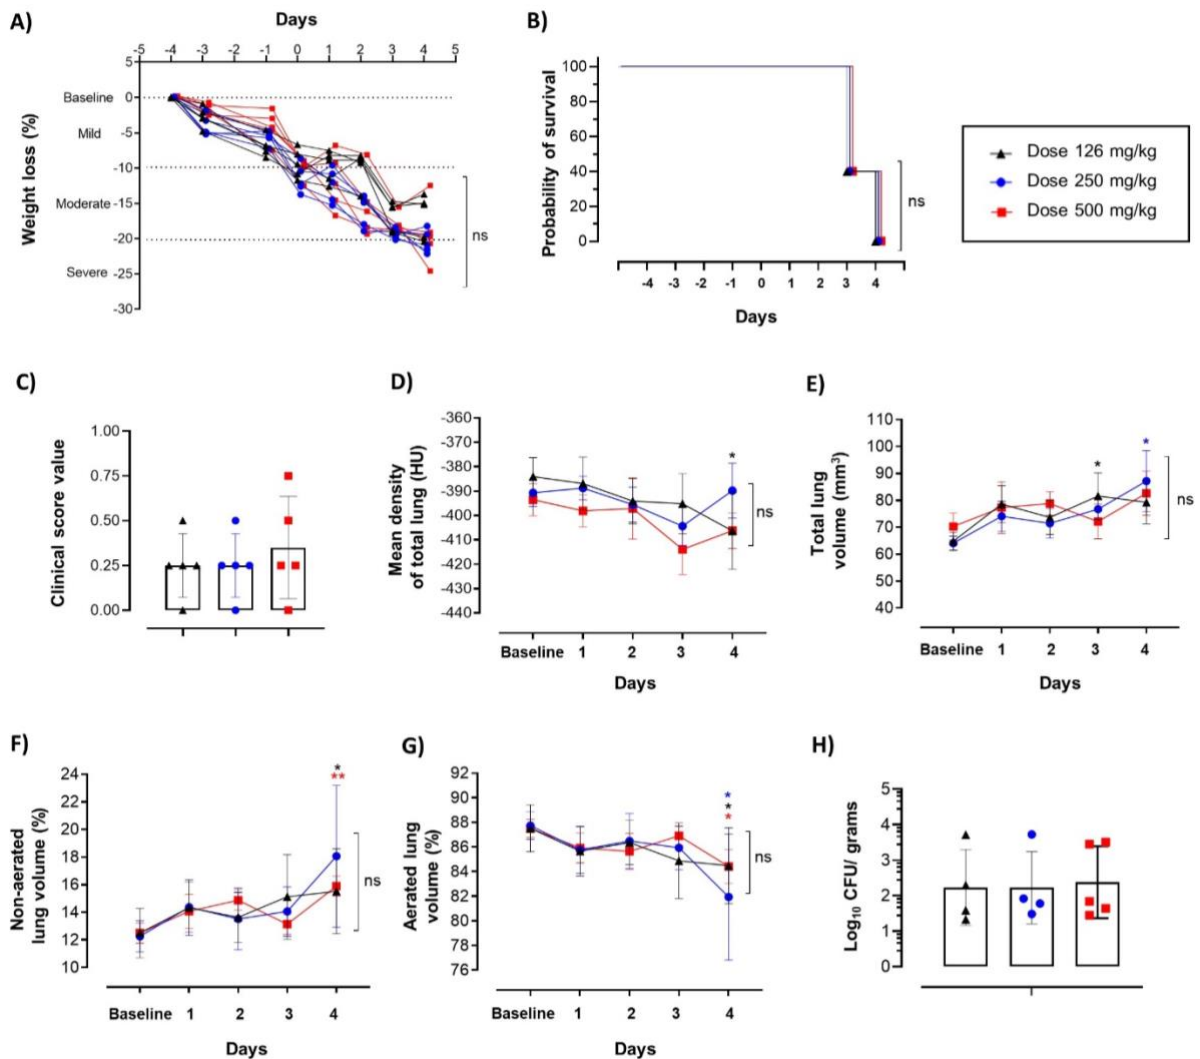

**Fig. S7. Multimodal imaging of *in vivo* luciferin dose-dependent effects in *Aspergillus* infected mice** **A)** Longitudinal weight loss percentage (%) evolution and **B)** survival comparison of orotracheally infected mice (*Af\_lucOPT\_red\_WT*  $5 \times 10^5$  spores) according to the administered luciferin dose of 126 mg/kg, 250 mg/kg and 500 mg/kg. **C)** Micro-CT lung scan lesion development visual score (cumulative clinical score) of infected mice, grouped per luciferin dose. **D)** Longitudinal quantification of mouse lung micro-CT scans: mean density of total lung volume (HU) and **E)** non-aerated (lung lesion) lung volume (mm<sup>3</sup>), grouped according to administered luciferin dose. **F)** Lung non-aerated and **G)** aerated lung volume percentage variances from total lung volume evolution over time, grouped per administered luciferin dose. **H)** Mean colony forming unit counts (log<sub>10</sub> CFU/gram counts) of lung homogenates of infected mice per luciferin dose, evaluated at sacrifice (day 3-4 after inoculation). Error bars represent SD of the results (mean) from multiple mice ( $n = 5$  male). Two-way repeated measures ANOVA (multiple comparison analysis, Tukey correction; A, C-H), Log-rank (Mantel-Cox) test (B); \*  $p < 0.05$ , \*\*  $p < 0.005$ ; to baseline (above) and between groups (lateral). **Abbreviations:** Wild type (WT), micro-computed tomography (micro-CT), Hounsfield Units (HU), non-significant (ns), colony forming units (CFU).

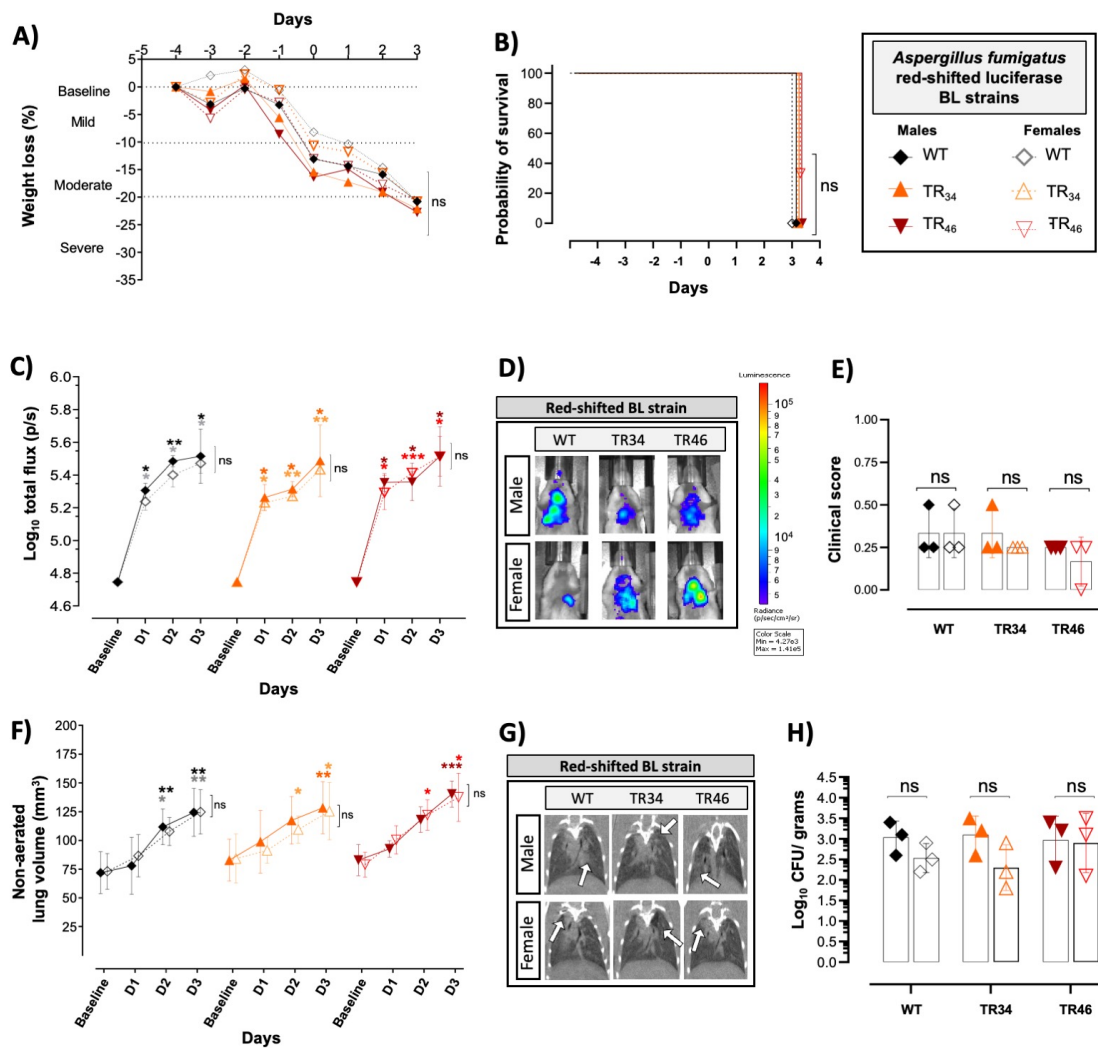

**Fig. S8. Multimodal disease development comparison of bioluminescent *Aspergillus fumigatus* strains in male and female mice.** **A)** Longitudinal weight loss percentage (%) and **B)** survival comparison of orotracheally inoculated cyclophosphamide immunosuppressed male and female mice with the Af\_lucOPT\_red\_WT, Af\_lucOPT\_red\_TR34 and Af\_lucOPT\_red\_TR46 strains ( $5 \times 10^5$  spores;  $n = 3$  per group). **C)** Lung BL signals ( $\log_{10}$  total flux) of infected mice before (baseline) and after infection, **D)** and representative BL images on day three after inoculation. **E)** Cumulative clinical scores representing visual assessment of lung lesion development on micro-CT scans and, **F)** quantitative evaluation of lung lesion development (non-aerated lung volume) over time. **G)** Representative coronal pulmonary micro-CT images of infected groups (arrows denote site of lesions). **H)** Colony-forming unit counts ( $\log_{10}$  CFU/gram) from lung homogenates of infected mice at sacrifice (day 3 after inoculation). Error bars represent SD of the results (mean) from multiple mice ( $n = 3$ ), Two-way repeated measures ANOVA (multiple comparison analysis, Tukey correction; A,C,E,F,H), Log-rank (Mantel-Cox) test (B); \*  $p < 0.05$ , \*\*  $p < 0.005$ , \*\*\*  $p < 0.0005$ . **Abbreviations:** Wild type (WT), bioluminescent (BL), micro-computed tomography (micro-CT), colony forming units (CFU), non-significant (ns).

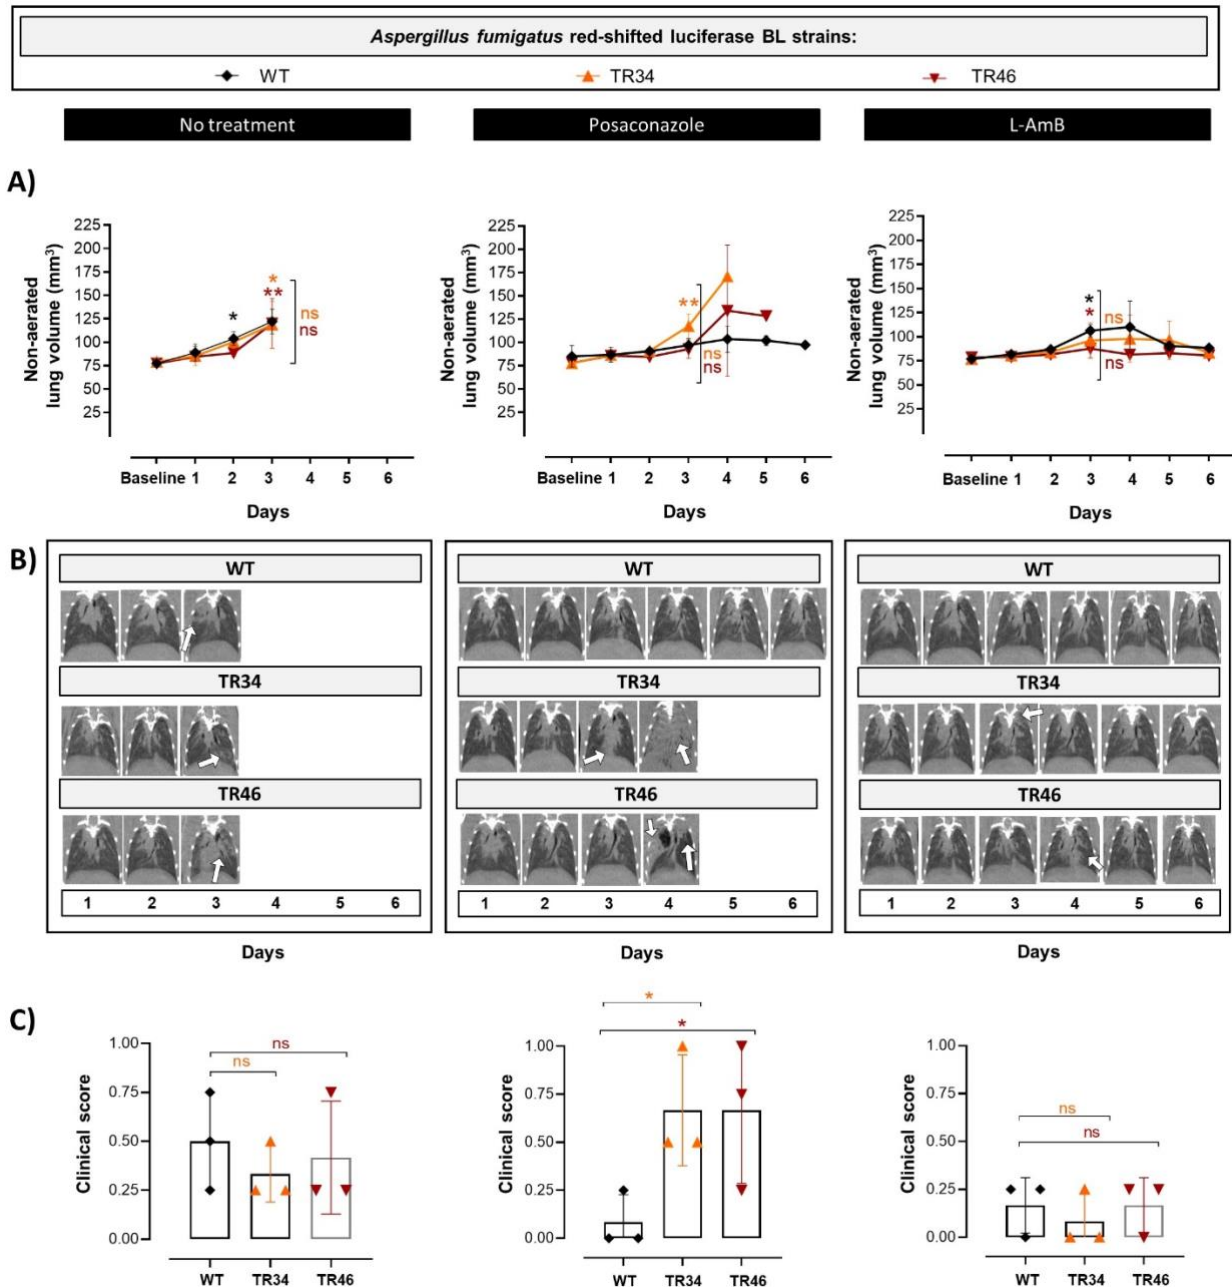

**Fig. S9. Micro-CT biomarker comparison on IPA development after *in vivo* antifungal treatment of infected mice with triazole-susceptible and -resistant BL *A. fumigatus* strains. A) Lung lesion development (non-aerated lung volume) before (baseline) and after infection. B) Longitudinal representative coronal pulmonary micro-CT images of infected groups and C) cumulative clinical scores representing visual assessment of lung lesion development on micro-CT scans (arrows denote site of lesions). Error bars represent SD of the results (mean) from multiple mice ( $n = 3$  male). Two-way repeated measures ANOVA (multiple comparison analysis, Tukey correction); \*  $p < 0.05$ , \*\*  $p < 0.005$ . **Abbreviations:** BL (bioluminescent), wild type (WT), micro-computed tomography (micro-CT), L-AmB (liposomal amphotericin B), non-significant (ns).**

**Table S1.** Blood cell analysis comparison of cyclophosphamide immunosuppressive schemes *in vivo*

| Day      | Blood analysis/<br>weight loss (%)            | Cyclophosphamide 100 mg/kg               |                                                    | Cyclophosphamide 150 mg/kg       |                                     | Control |
|----------|-----------------------------------------------|------------------------------------------|----------------------------------------------------|----------------------------------|-------------------------------------|---------|
|          |                                               | (Day -4, -3, -2, -1,<br>± booster day 3) | (Day -4, -3, -<br>2, -1, +<br>grapefruit<br>juice) | (Day -4, -1, ±<br>booster day 2) | (Day -4, -1, +<br>grapefruit juice) |         |
| <b>0</b> | White blood cells (cells/ $\mu$ l)            | 283.3                                    | 204.5                                              | 328.0                            | 226.7                               | 1656.7  |
|          | Neutrophils (cells/ $\mu$ l)                  | 135.5                                    | 67.3                                               | 97.8                             | 78.0                                | 760.0   |
|          | Lymphocytes (cells/ $\mu$ l)                  | 131.4                                    | 112.5                                              | 188.2                            | 94.9                                | 750.3   |
|          | Monocytes (cells/ $\mu$ l)                    | 4.6                                      | 0.4                                                | 5.9                              | 2.0                                 | 43.7    |
|          | Reticulocytes (cells/ $\mu$ l)                | 0.1                                      | 0.0                                                | 0.0                              | 0.0                                 | 3.0     |
|          | Platelets (cells/ $\mu$ l x 10 <sup>3</sup> ) | 147.3                                    | 181.5                                              | 421.2                            | 292.0                               | 489.7   |
|          | Weight loss (%)                               | 10.1                                     | 17.3                                               | 9.6                              | 15.8                                | + 1.1   |
| <b>1</b> | White blood cells (cells/ $\mu$ l)            | 233.3                                    | 203.3                                              | 210.0                            | 229.3                               |         |
|          | Neutrophils (cells/ $\mu$ l)                  | 57.4                                     | 82.0                                               | 48.3                             | 62.9                                |         |
|          | Lymphocytes (cells/ $\mu$ l)                  | 150.7                                    | 65.8                                               | 145.6                            | 138.4                               |         |
|          | Monocytes (cells/ $\mu$ l)                    | 3.0                                      | 2.4                                                | 1.9                              | 6.6                                 |         |
|          | Reticulocytes (cells/ $\mu$ l)                | 0.0                                      | 0.0                                                | 0.1                              | 0.1                                 |         |
|          | Platelets (cells/ $\mu$ l x 10 <sup>3</sup> ) | 148.7                                    | 175.7                                              | 278.5                            | 100.7                               |         |
|          | Weight loss (%)                               | 9.9                                      | 22.3                                               | 9.0                              | 19.1                                | + 0.1   |
| <b>2</b> | White blood cells (cells/ $\mu$ l)            | 243.3                                    | 583.3                                              | 278.3                            | 185.0                               |         |
|          | Neutrophils (cells/ $\mu$ l)                  | 102.8                                    | 110.73                                             | 87.7                             | 109.9                               |         |
|          | Lymphocytes (cells/ $\mu$ l)                  | 123.6                                    | 213.4                                              | 155.2                            | 63.1                                |         |
|          | Monocytes (cells/ $\mu$ l)                    | 8.4                                      | 11.2                                               | 13.6                             | 3.3                                 |         |
|          | Reticulocytes (cells/ $\mu$ l)                | 0.0                                      | 0.0                                                | 0.0                              | 0.0                                 |         |
|          | Platelets (cells/ $\mu$ l x 10 <sup>3</sup> ) | 189.7                                    | 179.8                                              | 282.0                            | 132.3                               |         |
|          | Weight loss (%)                               | 7.8                                      | 25.0                                               | 8.4                              | 20.9                                | + 0.8   |
| <b>3</b> | White blood cells (cells/ $\mu$ l)            | 263.3                                    | 482.5                                              | 376.7                            | 123.3                               | 526.0   |
|          | Neutrophils (cells/ $\mu$ l)                  | 142.5                                    | 243                                                | 158.9                            | 46.7                                | 95.3    |
|          | Lymphocytes (cells/ $\mu$ l)                  | 109.4                                    | 341.1                                              | 195.5                            | 35.5                                | 350.2   |
|          | Monocytes (cells/ $\mu$ l)                    | 10.4                                     | 11.2                                               | 10.6                             | 1.5                                 | 17.7    |
|          | Reticulocytes (cells/ $\mu$ l)                | 0.0                                      | 0.0                                                | 0.0                              | 0.0                                 | 0.2     |
|          | Platelets (cells/ $\mu$ l x 10 <sup>3</sup> ) | 252.0                                    | 221.8                                              | 178.7                            | 476.0                               | 520.0   |
|          | Weight loss (%)                               | 11.4                                     | 21.0                                               | 9.2                              | 9.2                                 | 22.6    |

|                                      | <b>No<br/>booster</b> | <b>Booster</b> |        |       |       |        |        |
|--------------------------------------|-----------------------|----------------|--------|-------|-------|--------|--------|
| <b>4</b>                             |                       |                |        |       |       |        |        |
| White blood cells (cells/ $\mu$ l)   | 350.0                 | 540.0          | 2514.0 | 880.0 | 243.3 | 1804.0 | 1838.0 |
| Neutrophils (cells/ $\mu$ l)         | 101.1                 | 132.1          | 900.3  | 118.4 | 54.4  | 650.9  | 413.8  |
| Lymphocytes (cells/ $\mu$ l)         | 206.2                 | 344.0          | 1268.8 | 640.2 | 137.6 | 840.8  | 1275.7 |
| Monocytes (cells/ $\mu$ l)           | 30.1                  | 16.4           | 93.2   | 32.5  | 0.5   | 55.2   | 34.9   |
| Reticulocytes (cells/ $\mu$ l)       | 0.0                   | 0.1            | 1.1    | 0.1   | 0.0   | 0.7    | 2.6    |
| Platelets (cells/ $\mu$ l x $10^3$ ) | 228.3                 | 329.0          | 472.6  | 571.7 | 502.3 | 329.2  | 501.0  |
| Weight loss (%)                      | 10.1                  | 11.1           | 18.6   | 4.6   | 10.1  | 27.1   | + 1.23 |
| <b>5</b>                             |                       |                |        |       |       |        |        |
| White blood cells (cells/ $\mu$ l)   |                       | 1881.7         |        |       | 128.3 |        |        |
| Neutrophil (cells/ $\mu$ l)          |                       | 544.1          |        |       | 55.2  |        |        |
| Lymphocytes (cells/ $\mu$ l)         |                       | 1127.3         |        |       | 57.8  |        |        |
| Monocytes (cells/ $\mu$ l)           |                       | 65.8           |        |       | 0.9   |        |        |
| Reticulocytes (cells/ $\mu$ l)       |                       | 1.5            |        |       | 0.0   |        |        |
| Platelets (cells/ $\mu$ l x $10^3$ ) |                       | 637.5          |        |       | 403.0 |        |        |
| Weight loss (%)                      |                       | 9.03           |        |       | 12.49 |        |        |

Grouped mean cell counts of 3 mice per analyzed regimen group per time point

**Table S2.** Primer sequences for the development of red-shifted luciferase expressing *Aspergillus fumigatus* bioluminescent strains

| Name             | Sequence (5' → 3')                                        | Function (Amplification)                                                                                                  |
|------------------|-----------------------------------------------------------|---------------------------------------------------------------------------------------------------------------------------|
| IF_Luc_PgpdA_f   | ATG GAG GAC GCC AAG AAC ATC                               | Amplification of Af_ <i>luc</i> <sub>OPT_red</sub>                                                                        |
| IF_Luc_TgpdA_r   | CTA GAC GGC GAT CTT GCCG                                  | Amplification of Af_ <i>luc</i> <sub>OPT_red</sub>                                                                        |
| IF_PgpdAAn_f     | CTG CCA ATT GGA TCC CGG GCT GAG<br>TAA TAA GCG CAC        | Amplification of <i>gpdA</i> gene promoter from <i>A. nidulans</i>                                                        |
| IF_PgpdAAn_Luc_r | CTT GGC GTC CTC CAT TGT GAT GTC<br>TGC TCA AGCG           | Fusion of <i>gpdA</i> gene promoter of <i>A. nidulans</i> with Af_ <i>luc</i> <sub>OPT_red</sub>                          |
| IF_TgpdA_Luc_f   | AAG ATC GCC GTC TAG GAA ACA GGT<br>CGG AAG CC             | Amplification of the terminator of <i>gpdA</i> gene of <i>A. nidulans</i>                                                 |
| IF_PgpdAter_r    | GCG CTG CAG GGG CCC GGG TGG TAG<br>CTC GTT GTC GAC        | Amplification of the terminator of <i>gpdA</i> gene of <i>A. nidulans</i>                                                 |
| KU80upIFpUC_f    | CGA GCT CGG TAC CCG GGA CTC AAT<br>TTC TAT TCT AGA GCA TC | Amplification of upstream region of <i>akuB</i> and fusion with pUC19                                                     |
| KU80upIFPgpdA_r  | GCG GCC GCC TCA GGG TCG TCA AAG<br>TCA GTAC               | Amplification of upstream region of <i>akuB</i> and fusion with <i>gpdA</i> gene promoter                                 |
| PgpdAIFKu80up_f  | CCC TGA GGC GGC CGC GGG CTG AGT<br>AAT AAG                | Amplification of PgpdA:Af_ <i>luc</i> <sub>OPT_red</sub> TgpdA_ptrA and fusion with upstream region of <i>akuB</i> gene   |
| ptraIFKu80do_r   | AAC TTT GGG CGG CCG CGT ATT ATA<br>CTG TC                 | Amplification of PgpdA:Af_ <i>luc</i> <sub>OPT_red</sub> TgpdA_ptrA and fusion with downstream region of <i>akuB</i> gene |
| KU80doIFptrA_f   | GCG GCC GCC CAA AGT TAA AGG GCG<br>CAA GC                 | Amplification of downstream region of <i>akuB</i> gene and fusion with <i>ptrA</i>                                        |
| KU80doIFpUC_r    | CTC TAG AGG ATC CCC GGG CTA TCA<br>CTT TGC CCA GTC        | Amplification of downstream region of <i>akuB</i> gene and fusion with pUC19                                              |
| pCYP51A_f        | CCT ATA AGT CGA GTG CAG GAC                               | Amplification of azole resistance gene ( <i>cyp51A</i> )                                                                  |
| tCYP51A_r        | GAA GTC CTC GAT GGT TAC AAC                               | Amplification of azole resistance gene ( <i>cyp51A</i> )                                                                  |
| CypAfHind_up_f   | CTG CAG GCA TGC AAG CTT CTT CAA<br>TGC TCA GGC ATG        | Amplification of the complementation <i>cyp51A</i> construct and fusion with pUC19                                        |
| CypAfNotDown_f   | GCA CAG CGG CCG CAC GCA AAG ACG<br>AGA AGG                | Amplification of the complementation <i>cyp51A</i> construct and fusion with pUC19                                        |
| CypAfNotTer_r    | GCG TGC GGC CGC TGT GCA CTG TTC<br>TGG TTCC               | Amplification of the complementation <i>cyp51A</i> construct and fusion with pUC19                                        |
| CypAfHindDown_r  | CAT GAT TAC GCC AAG CTT GAA CAT<br>CGA ACC TCT CGT GTG    | Amplification of the complementation <i>cyp51A</i> construct and fusion with pUC19                                        |

**Table S3.** *In vitro* mycological characteristics of genetically modified *Aspergillus fumigatus* strains

|                                                | Parental Strain        | Complemented strain                                                                                                  | Parental Strain               | Complemented strain                                                                                                          |
|------------------------------------------------|------------------------|----------------------------------------------------------------------------------------------------------------------|-------------------------------|------------------------------------------------------------------------------------------------------------------------------|
|                                                | Af_lucOPT_red_TR34     | Af_lucOPT_red_TR34<br>+ WT <sub>cyp51A</sub> -TR <sub>34</sub> /L98H<br><br>(comp 3216-1, ΔakuB::luc<br>No. 23 hygR) | Af_lucOPT_red_TR46            | Af_lucOPT_red_TR46<br>+ WT <sub>cyp51A</sub> -TR <sub>46</sub> /Y121F/T289A<br><br>(comp4003new7, ΔakuB::luc<br>No. 15 hygR) |
| <b>Characteristics</b>                         |                        |                                                                                                                      |                               |                                                                                                                              |
| <b>Susceptibility (MIC; mg/L) <sup>1</sup></b> |                        |                                                                                                                      |                               |                                                                                                                              |
| Voriconazole                                   | 8                      | 1                                                                                                                    | >16                           | 0.5                                                                                                                          |
| Posaconazole                                   | 0.5                    | 0.125                                                                                                                | 0.5                           | 0.125                                                                                                                        |
| Itraconazole                                   | 16                     | 0.5                                                                                                                  | 16                            | 0.25                                                                                                                         |
| Phenotype <sup>2</sup>                         | Resistant              | WT                                                                                                                   | Resistant                     | WT                                                                                                                           |
| <b>Cyp51A gene mutation</b>                    |                        |                                                                                                                      |                               |                                                                                                                              |
|                                                | TR <sub>34</sub> /L98H | -                                                                                                                    | TR <sub>46</sub> /Y121F/T289A | -                                                                                                                            |

<sup>1</sup> EUCAST method for susceptibility testing of molds (version 9.3.2). <sup>2</sup> EUCAST clinical breakpoints version 10.0 (Resistance MIC values: itraconazole > 1, voriconazole > 1, posaconazole > 0.25 mg/L).

**Abbreviations:** MIC (minimum inhibitory concentration), WT (Wild type= susceptible to triazole antifungals).
